# Supplementary material for: Frequency of Interferon-Resistance Conferring Substitutions in Amino Acid Positions 70 and 91 of Core Protein of the Russian HCV 1b Isolates Analyzed in the T-Cell Epitopic Context
Source: J Immunol Res. 2018 Feb 7;2018:7685371. doi: 10.1155/2018/7685371 (PMC5821972; doi:10.1155/2018/7685371)
Supplement: Supplementary 3 — Figure S3: T-cell epitopes in the consensus amino acid sequence of nucleocapsid (core) of HCV 1b encompassing amino acids 70 (A) and 91 (B) localized using Immune Epitope Database and Analysis resource (http://www.iedb.org). [file 7685371.f3.xlsx]

## Sheet: 70 отдельно
	Epitope ID	Ag ID	Organism Name	Tipe of HLA	61	62	63	64	65	66	67	68	69	70	71	72	73	74	75	76	77	78	79	80	81	82	83
	29932	CAB53095.1	Hepatitis C virus subtype 1b	HLA class II							K	A	R	Q	P	E	G	R	A	W	A	Q	P	G
	34194	AAF65950.1	Hepatitis C virus subtype 1a								K	V	R	R	P	E	G	R	T	W	A	Q	P	G
	47949	P27958.3	Hepatitis C virus					P	I	P	K	A	R	R	P	E	G	R	T	W	A	Q	P	G	Y
	55463	CAB53095.1	Hepatitis C virus subtype 1b			R	Q	P	I	P	K	A	R	Q	P	E	G	R	A
	55465	AAF65950.1	Hepatitis C virus subtype 1a			R	Q	P	I	P	K	V	R	R	P	E	G	R	T
	55701	BAA03375.1	Hepatitis C virus subtype 1b		R	R	Q	P	I	P	K	A	R	R	P	E	G	R	T	W	A	Q	P	G
	539773	AAA52748.1	Hepatitis C virus subtype 1b							P	K	A	R	R	P	E	G	R	A	W	A	Q	P	G	Y	P	W
	539774	AAK08509.1	Hepatitis C virus subtype 1b							P	K	A	R	R	P	E	G	R	T	W	A	Q	P	G	Y	P	W
	539775	ACZ60102.1	Hepatitis C virus subtype 3a							P	K	A	R	R	S	E	G	R	S	W	A	Q	P	G	Y	P	W
	consensus of HCV-1b (n=189, Russia)				61	62	63	64	65	66	67	68	69	70	71	72	73	74	75	76	77	78	79	80	81	82	83	n	%(n=189)
					R	R	Q	P	I	P	K	A	R	R	P	E	G	R	A	W	A	Q	P	G	Y	P	W	62	0.328
					R	R	Q	P	I	P	K	A	R	R	P	E	G	R	T	W	A	Q	P	G	Y	P	W	52	0.275
					R	R	Q	P	I	P	K	A	R	Q	P	E	G	R	A	W	A	Q	P	G	Y	P	W	27	0.143
					R	R	Q	P	I	P	K	A	R	Q	P	E	G	R	T	W	A	Q	P	G	Y	P	W	8	0.042
					R	R	Q	P	I	P	K	A	R	Q	P	E	G	R	V	W	A	Q	P	G	Y	P	W	7	0.037
					R	R	Q	P	I	P	K	A	R	R	P	E	G	R	S	W	A	Q	P	G	Y	P	W	5	0.026
					R	R	Q	P	I	P	K	A	R	H	P	E	G	R	A	W	A	Q	P	G	Y	P	W	3	0.016
					R	R	Q	P	I	P	K	A	R	H	P	E	G	R	T	W	A	Q	P	G	Y	P	W	3	0.016
					W	R	Q	P	I	P	K	A	R	R	P	E	G	R	A	W	A	Q	P	G	Y	P	W	1	0.005
					R	R	Q	P	I	P	R	A	R	Q	P	E	G	R	A	W	A	Q	P	G	Y	P	W	1	0.005
					R	R	Q	P	I	P	R	V	R	Q	P	E	G	R	A	W	A	Q	P	G	Y	P	W	1	0.005
					R	R	Q	P	I	P	K	V	R	Q	S	E	G	R	S	W	A	Q	P	G	Y	P	W	1	0.005
					R	R	Q	P	I	P	K	V	R	Q	R	E	G	R	T	W	A	Q	P	G	Y	P	W	1	0.005
					R	R	Q	P	I	P	K	V	R	R	P	E	G	R	A	W	A	Q	P	G	Y	P	W	1	0.005
					R	R	Q	P	I	P	K	D	R	R	P	E	G	R	T	W	A	Q	P	G	Y	P	W	1	0.005
					R	R	Q	P	I	P	K	A	R	Q	T	E	G	R	A	W	A	Q	P	G	Y	P	W	1	0.005
					R	R	Q	P	I	P	K	A	R	Q	R	E	G	R	T	W	A	Q	P	G	Y	P	W	1	0.005
					R	R	Q	P	I	P	K	A	R	R	S	E	G	R	A	W	A	Q	P	G	Y	P	W	1	0.005
					R	R	Q	P	I	P	K	A	R	R	T	E	G	R	A	W	A	Q	P	G	Y	P	W	1	0.005
					R	R	Q	P	I	P	K	A	R	R	S	E	G	R	T	W	A	Q	P	G	Y	P	W	1	0.005
					R	R	Q	P	I	P	K	A	R	R	T	E	G	R	T	W	A	Q	P	G	Y	P	W	1	0.005
					R	R	Q	P	I	P	K	A	R	Q	P	K	G	R	T	W	A	Q	P	G	Y	P	W	1	0.005
					R	R	Q	P	I	P	K	A	R	R	P	A	G	R	A	W	A	Q	P	G	Y	P	W	1	0.005
					R	R	Q	P	I	P	K	A	R	H	P	E	G	R	S	W	A	Q	P	G	Y	P	W	1	0.005
					R	R	Q	P	I	P	K	A	R	H	P	E	G	R	V	W	A	Q	P	G	Y	P	W	1	0.005
					R	R	Q	P	I	P	K	A	R	Q	P	E	G	R	N	W	A	Q	P	G	Y	P	W	1	0.005
					R	R	Q	P	I	P	K	A	R	Q	P	E	G	R	S	W	A	Q	P	G	Y	P	W	1	0.005
					R	R	Q	P	I	P	K	A	R	R	P	E	G	R	A	W	A	H	P	G	Y	P	W	1	0.005
					R	R	Q	P	I	P	K	A	R	R/Q	P	E	G	R	T	W	A	Q	P	G	Y	P	W	1	0.005
					R	R	Q	P	I	P	K	A	R	R/Q	P	E	G	R	A	W	A	Q	P	G	Y	P	W	1	0.005
	Epitope ID	Ag ID	Organism Name	Tipe of HLA	78	79	80	81	82	83	84	85	86	87	88	89	90	91	92	93	94	95	96	97	98	99	100	101	102	103	104
	7999	BAA82580.1	Hepatitis C virus	HLA class I										D	E	G	L	G	W	A	G	W
	20894	BAF91806.1	Hepatitis C virus													G	L	G	W	V	G	W	L	L
	43619	P26664.3	Hepatitis C virus												N	E	G	C	G	W	A	G	W
	43621	AAB02128.1	Hepatitis C virus (isolate H77)												N	E	G	C	G	W	M	G	W
	43624	P26660.3	Hepatitis C virus isolate HC-J6												N	E	G	L	G	W	A	G	W
	43627	AAX68853.1	Hepatitis C virus											N	E	G	L	G	W	T	G	W
	43628	BAA03375.1	Hepatitis C virus subtype 1b												N	E	G	M	G	W	A	G	W
	23432	P26664.3	Hepatitis C virus	HLA class II			G	Y	P	W	P	L	Y	G	N	E	G	C	G	W	A	G	W	L	L	S	P	R	G	S	R
	40773	AAR12079.1	Hepatitis C virus subtype 1a									L	Y	G	N	E	G	C	G	W	A	G	W	L	L
	40774	P27958.3	Hepatitis C virus subtype 1a									L	Y	G	N	E	G	C	G	W	A	G	W	L	L	S
	40776	AAS15464.1	Hepatitis C virus									L	Y	G	N	E	G	C	G	W	A	G	W	L	L	S	P	R	G	S	R
	40778	ABV46286.2	Hepatitis C virus subtype 1b									L	Y	G	N	E	G	M	G	W	A	G	W	L	L
	48533	AAB66324.1	Hepatitis C virus								P	L	Y	G	N	E	G	C	G	W	A	G	W	L	L
	51851	P27958.3	Hepatitis C virus		Q	P	G	Y	P	W	P	L	Y	G	N	E	G	C	G	W	A	G
	75432	AAR12079.1	Hepatitis C virus subtype 1a					Y	P	W	P	L	Y	G	N	E	G	C	G	W	A
	75434	AAA45676.1	Hepatitis C virus subtype 1a					Y	P	W	P	L	Y	G	N	E	G	C	G	W	A	G	W	L	L	S	P
	75435	AAB02128.1	Hepatitis C virus					Y	P	W	P	L	Y	G	N	E	G	C	G	W	M	G	W	L	L	S	P
	75436	P90247	Hepatitis C virus (isolate 1)					Y	P	W	P	L	Y	G	N	E	G	L	G	W	A	G	W	L	L	S	P
	75437	BAD73987.1	Hepatitis C virus subtype 1b					Y	P	W	P	L	Y	G	N	E	G	M	G	W	A
	75438	BAA03375.1	Hepatitis C virus subtype 1b					Y	P	W	P	L	Y	G	N	E	G	M	G	W	A	G	W	L	L	S	P
	consensus of HCV-1b (n=189, Russia)				78	79	80	81	82	83	84	85	86	87	88	89	90	91	92	93	94	95	96	97	98	99	100	101	102	103	104	n	%(n=189)
					Q	P	G	Y	P	W	P	L	Y	G	N	E	G	M	G	W	A	G	W	L	L	S	P	R	G	S	R	121	0.64
					Q	P	G	Y	P	W	P	L	Y	G	N	E	G	L	G	W	A	G	W	L	L	S	P	R	G	S	R	30	0.159
					Q	P	G	Y	P	W	P	L	Y	G	N	E	G	M	G	W	A	G	W	L	L	S	P	-	-	-	-	12	0.063
					Q	P	G	Y	P	W	P	L	Y	G	N	E	G	M	G	W	A	G	W	L	L	S	P	H	G	S	R	9	0.048
					Q	P	G	Y	P	W	P	L	Y	G	N	E	G	L	G	W	A	G	W	L	L	S	P	-	-	-	-	3	0.016
					H	P	G	Y	P	W	P	L	Y	G	N	E	G	W	G	W	A	G	W	L	L	S	P	R	G	S	R	1	0.005
					Q	P	G	Y	P	W	P	L	Y	G	N	E	G	C	G	W	A	G	W	L	L	S	P	R	G	S	R	1	0.005
					Q	P	G	Y	P	W	P	L	Y	G	N	E	G	L	G	W	A	G	W	F	L	S	P	R	G	S	R	1	0.005
					Q	P	G	Y	P	W	P	L	Y	G	N	E	G	L	G	W	A	G	W	L	L	S	P	H	G	S	R	1	0.005
					Q	P	G	Y	P	W	P	L	Y	A	N	E	G	M	G	W	A	G	W	L	L	S	P	R	G	S	R	1	0.005
					Q	P	G	Y	P	W	P	L	Y	D	N	E	G	M	G	W	A	G	W	L	L	S	P	-	-	-	-	1	0.005
					Q	P	G	Y	P	W	P	L	Y	G	D	E	G	M	G	W	A	G	W	L	L	S	P	R	G	S	R	1	0.005
					Q	P	G	Y	P	W	P	L	Y	G	K	E	G	M	G	W	A	G	W	L	L	S	P	R	V	S	R	1	0.005
					Q	P	G	Y	P	W	P	L	Y	G	N	Q	G	M	G	W	A	R	W	F	M	S	P	-	-	-	-	1	0.005
					Q	P	G	Y	P	W	P	L	Y	G	N	E	G	M	G	W	A	R	W	L	L	S	P	R	G	S	R	1	0.005
					Q	P	G	Y	P	W	P	L	Y	G	N	E	G	M	G	W	A	G	W	F	L	S	P	R	G	S	R	1	0.005
					Q	P	G	Y	P	W	P	L	Y	G	N	E	G	M	G	W	A	G	W	L	L	S	P	R	G	L	W	1	0.005
					Q	P	G	Y	P	W	P	L	Y	G	N	E	G	M	G	W	A	G	G	L	L	S	P	R	G	L	R	1	0.005
					Q	P	G	Y	P	W	P	L	Y	G	N	E	G	M	G	W	A	G	W	L	L	S	P	R	G	S	Q	1	0.005

## Sheet: 91 отдельно
	Epitope ID	Ag ID	Organism Name	Tipe of HLA	73	74	75	76	77	78	79	80	81	82	83	84	85	86	87	88	89	90	91	92	93	94	95	96	97	98	99	100	101	102	103	104
	7999	BAA82580.1	Hepatitis C virus	HLA class I															D	E	G	L	G	W	A	G	W
	20894	BAF91806.1	Hepatitis C virus																		G	L	G	W	V	G	W	L	L
	43619	P26664.3	Hepatitis C virus																	N	E	G	C	G	W	A	G	W
	43621	AAB02128.1	Hepatitis C virus (isolate H77)																	N	E	G	C	G	W	M	G	W
	43624	P26660.3	Hepatitis C virus isolate HC-J6																	N	E	G	L	G	W	A	G	W
	43627	AAX68853.1	Hepatitis C virus																N	E	G	L	G	W	T	G	W
	43628	BAA03375.1	Hepatitis C virus subtype 1b	HLA class II																N	E	G	M	G	W	A	G	W
	22225	AAS15464.1	Hepatitis C virus		G	R	T	W	A	Q	P	G	Y	P	W	P	L	Y	G	N	E	G	C	G
	23432	P26664.3	Hepatitis C virus									G	Y	P	W	P	L	Y	G	N	E	G	C	G	W	A	G	W	L	L	S	P	R	G	S	R
	40773	AAR12079.1	Hepatitis C virus subtype 1a														L	Y	G	N	E	G	C	G	W	A	G	W	L	L
	40774	P27958.3	Hepatitis C virus subtype 1a														L	Y	G	N	E	G	C	G	W	A	G	W	L	L	S
	40776	AAS15464.1	Hepatitis C virus														L	Y	G	N	E	G	C	G	W	A	G	W	L	L	S	P	R	G	S	R
	40778	ABV46286.2	Hepatitis C virus subtype 1b														L	Y	G	N	E	G	M	G	W	A	G	W	L	L
	48533	AAB66324.1	Hepatitis C virus													P	L	Y	G	N	E	G	C	G	W	A	G	W	L	L
	51851	P27958.3	Hepatitis C virus							Q	P	G	Y	P	W	P	L	Y	G	N	E	G	C	G	W	A	G
	75432	AAR12079.1	Hepatitis C virus subtype 1a										Y	P	W	P	L	Y	G	N	E	G	C	G	W	A
	75434	AAA45676.1	Hepatitis C virus subtype 1a										Y	P	W	P	L	Y	G	N	E	G	C	G	W	A	G	W	L	L	S	P
	75435	AAB02128.1	Hepatitis C virus										Y	P	W	P	L	Y	G	N	E	G	C	G	W	M	G	W	L	L	S	P
	75436	P90247	Hepatitis C virus (isolate 1)										Y	P	W	P	L	Y	G	N	E	G	L	G	W	A	G	W	L	L	S	P
	75437	BAD73987.1	Hepatitis C virus subtype 1b										Y	P	W	P	L	Y	G	N	E	G	M	G	W	A
	75438	BAA03375.1	Hepatitis C virus subtype 1b										Y	P	W	P	L	Y	G	N	E	G	M	G	W	A	G	W	L	L	S	P
	consensus of HCV-1b (n=189, Russia)									78	79	80	81	82	83	84	85	86	87	88	89	90	91	92	93	94	95	96	97	98	99	100	101	102	103	104	n	%(n=189)
										Q	P	G	Y	P	W	P	L	Y	G	N	E	G	M	G	W	A	G	W	L	L	S	P	R	G	S	R	121	0.64
										Q	P	G	Y	P	W	P	L	Y	G	N	E	G	L	G	W	A	G	W	L	L	S	P	R	G	S	R	30	0.159
										Q	P	G	Y	P	W	P	L	Y	G	N	E	G	M	G	W	A	G	W	L	L	S	P	-	-	-	-	12	0.063
										Q	P	G	Y	P	W	P	L	Y	G	N	E	G	M	G	W	A	G	W	L	L	S	P	H	G	S	R	9	0.048
										Q	P	G	Y	P	W	P	L	Y	G	N	E	G	L	G	W	A	G	W	L	L	S	P	-	-	-	-	3	0.016
										H	P	G	Y	P	W	P	L	Y	G	N	E	G	W	G	W	A	G	W	L	L	S	P	R	G	S	R	1	0.005
										Q	P	G	Y	P	W	P	L	Y	G	N	E	G	C	G	W	A	G	W	L	L	S	P	R	G	S	R	1	0.005
										Q	P	G	Y	P	W	P	L	Y	G	N	E	G	L	G	W	A	G	W	F	L	S	P	R	G	S	R	1	0.005
										Q	P	G	Y	P	W	P	L	Y	G	N	E	G	L	G	W	A	G	W	L	L	S	P	H	G	S	R	1	0.005
										Q	P	G	Y	P	W	P	L	Y	A	N	E	G	M	G	W	A	G	W	L	L	S	P	R	G	S	R	1	0.005
										Q	P	G	Y	P	W	P	L	Y	D	N	E	G	M	G	W	A	G	W	L	L	S	P	-	-	-	-	1	0.005
										Q	P	G	Y	P	W	P	L	Y	G	D	E	G	M	G	W	A	G	W	L	L	S	P	R	G	S	R	1	0.005
										Q	P	G	Y	P	W	P	L	Y	G	K	E	G	M	G	W	A	G	W	L	L	S	P	R	V	S	R	1	0.005
										Q	P	G	Y	P	W	P	L	Y	G	N	Q	G	M	G	W	A	R	W	F	M	S	P	-	-	-	-	1	0.005
										Q	P	G	Y	P	W	P	L	Y	G	N	E	G	M	G	W	A	R	W	L	L	S	P	R	G	S	R	1	0.005
										Q	P	G	Y	P	W	P	L	Y	G	N	E	G	M	G	W	A	G	W	F	L	S	P	R	G	S	R	1	0.005
										Q	P	G	Y	P	W	P	L	Y	G	N	E	G	M	G	W	A	G	W	L	L	S	P	R	G	L	W	1	0.005
										Q	P	G	Y	P	W	P	L	Y	G	N	E	G	M	G	W	A	G	G	L	L	S	P	R	G	L	R	1	0.005
										Q	P	G	Y	P	W	P	L	Y	G	N	E	G	M	G	W	A	G	W	L	L	S	P	R	G	S	Q	1	0.005
7999	Linear peptide	DEGLGWAGW	87	HLA class I	HLA-B44	1b	core protein	BAA82580.1	Hepatitis C virus
20894	Linear peptide	GLGWVGWLL	89	HLA class I	HLA-A*02:01		polyprotein [Hepatitis C virus]	BAF91806.1	Hepatitis C virus
21279	Linear peptide	GMGWAGWLLSPRGS	90	HLA class II	HLA-DR		polyprotein	BAD73987.1	Hepatitis C virus subtype 1b
22225	Linear peptide	GRTWAQPGYPWPLYGNEGCG	73	HLA class II			core protein	AAS15464.1	Hepatitis C virus
23432	Linear peptide	GYPWPLYGNEGCGWAGWLLSPRGSR	80	HLA class II			Genome polyprotein	P26664.3	Hepatitis C virus
36352	Linear peptide	LGWAGWLLSPRGSRPSWGPT	91	HLA class II			Polyprotein	P90247	Hepatitis C virus
40776	Linear peptide	LYGNEGCGWAGWLLSPRGSR	85	HLA class II			core protein	AAS15464.1	Hepatitis C virus
40778	Linear peptide	LYGNEGMGWAGWLL	85	HLA class II			polyprotein	ABV46286.2	Hepatitis C virus subtype 1b
41648	Linear peptide	MGWAGWLLSPRGSRPSWGPT	91	HLA class II			polyprotein	BAA03375.1	Hepatitis C virus subtype 1b
43619	Linear peptide	NEGCGWAGW	88	HLA class I			Genome polyprotein	P26664.3	Hepatitis C virus
43621	Linear peptide	NEGCGWMGW	88	HLA class I			largest ORF	AAB02128.1	Hepatitis C virus (isolate H77)
43624	Linear peptide	NEGLGWAGW	88	HLA class I	HLA-B44		Genome polyprotein	P26660.3	Hepatitis C virus isolate HC-J6
43627	Linear peptide	NEGLGWTGW	87	HLA class I	HLA-B44		core protein	AAX68853.1	Hepatitis C virus
43628	Linear peptide	NEGMGWAGW	88	HLA class I	HLA-B44		polyprotein	BAA03375.1	Hepatitis C virus subtype 1b
48533	Linear peptide	PLYGNEGCGWAGWLL	84	HLA class II			polyprotein	AAB66324.1	Hepatitis C virus
51851	Linear peptide	QPGYPWPLYGNEGCGWAG	78	HLA class II			Genome polyprotein	P27958.3	Hepatitis C virus
75435	Linear peptide	YPWPLYGNEGCGWMGWLLSP	81	HLA class II			largest ORF	AAB02128.1	Hepatitis C virus
75436	Linear peptide	YPWPLYGNEGLGWAGWLLSP	81	HLA class II			Polyprotein	P90247	Hepatitis C virus (isolate 1)
75437	Linear peptide	YPWPLYGNEGMGWA	81	HLA class II			polyprotein	BAD73987.1	Hepatitis C virus subtype 1b
75438	Linear peptide	YPWPLYGNEGMGWAGWLLSP	81	HLA class II			polyprotein	BAA03375.1	Hepatitis C virus subtype 1b
177713	Linear peptide	GRAWAQPGYPWPLYGNEGL	73	HLA class II			polyprotein	ABU97068.1	Hepatitis C virus subtype 1b

## Sheet: 7685371.v2.
	aa position in core			47	48	49	50	51	52	53	54	55	56	57	58	59	60	61	62	63	64	65	66	67	68	69	70	71	72	73	74	75	76	77	78	79	80	81	82	83
	aa consensus HCV 1b (Russia)			R	A	T	R	K	T	S	E	R	S	Q	P	R	G	R	R	Q	P	I	P	K	A	R	R	P	E	G	R	A	W	A	Q	P	G	Y	P	W
	Epitope ID	Ag ID	HLA restriction
	33859	BAA03375.1	HLA class I/ II					K	T	S	E	R	S	Q	P	R	G	R	R	Q	P	I	P	K	A	R	R
	51953	CAB53095.1	HLA class I/ II											Q	P	R	G	R	R	Q	P	I	P	K	A	R	Q
	55701	BAA03375.1	HLA class I/ II															R	R	Q	P	I	P	K	A	R	R	P	E	G	R	T	W	A	Q	P	G
	29932	CAB53095.1	HLA class II																					K	A	R	Q	P	E	G	R	A	W	A	Q	P	G
	53176	P26663.3	HLA class II	R	A	P	R	K	T	S	E	R	S	Q	P	R	G	R	R	Q	P	I	P	K	A	R	R
	55463	CAB53095.1	HLA class II																R	Q	P	I	P	K	A	R	Q	P	E	G	R	A
	539773	AAA52748.1	HLA class II																				P	K	A	R	R	P	E	G	R	A	W	A	Q	P	G	Y	P	W
	539774	AAK08509.1	HLA class II																				P	K	A	R	R	P	E	G	R	T	W	A	Q	P	G	Y	P	W
	aa position in core			73	74	75	76	77	78	79	80	81	82	83	84	85	86	87	88	89	90	91	92	93	94	95	96	97	98	99	100	101	102	103	104	105	106	107	108	109	110
	aa consensus HCV 1b (Russia)			G	R	A	W	A	Q	P	G	Y	P	W	P	L	Y	G	N	E	G	M	G	W	A	G	W	L	L	S	P	R	G	S	R	P	S	W	G	P	T
	Epitope ID	Ag ID	HLA restriction
	21279	BAD73987.1	HLA class II																		G	M	G	W	A	G	W	L	L	S	P	R	G	S
	40778	ABV46286.2	HLA class II													L	Y	G	N	E	G	M	G	W	A	G	W	L	L
	75437	BAD73987.1	HLA class II									Y	P	W	P	L	Y	G	N	E	G	M	G	W	A
	75436	P90247	HLA class I/II									Y	P	W	P	L	Y	G	N	E	G	L	G	W	A	G	W	L	L	S	P
	7999	BAA82580.1	HLA class I																D	E	G	L	G	W	A	G	W
	36352	P90247	HLA class I																			L	G	W	A	G	W	L	L	S	P	R	G	S	R	P	S	W	G	P	T
	41648	BAA03375.1	HLA class I																			M	G	W	A	G	W	L	L	S	P	R	G	S	R	P	S	W	G	P	T
	43627	AAX68853.1	HLA class I																N	E	G	L	G	W	T	G	W
	43628	BAA03375.1	HLA class I																N	E	G	M	G	W	A	G	W
	75438	BAA03375.1	HLA class I									Y	P	W	P	L	Y	G	N	E	G	M	G	W	A	G	W	L	L	S	P
	177713	ABU97068.1		G	R	A	W	A	Q	P	G	Y	P	W	P	L	Y	G	N	E	G	L
